1 Architecture of Marine Food Webs: to be or not be a ‘small-world’

2

3

4 Tomás Ignacio Marina<sup>1,2,3#</sup>, Leonardo A. Saravia<sup>2,3#</sup>, Georgina Cordone<sup>1,2,4¶</sup>, Vanesa Salinas<sup>1,2¶</sup>, Santiago  
5 R. Doyle<sup>2¶</sup> and Fernando R. Momo<sup>2,3¶</sup>

6

7 <sup>1</sup> Consejo Nacional de Investigaciones Científicas y Técnicas (CONICET), Argentina

8 <sup>2</sup> Instituto de Ciencias, Universidad Nacional de General Sarmiento, Los Polvorines, Argentina

9 <sup>3</sup> INEDES, Universidad Nacional de Luján, Luján, Argentina

10 <sup>4</sup> Centro Para el Estudio de Sistemas Marinos (CESIMAR), Centro Nacional Patagónico (CENPAT),  
11 Puerto Madryn, Chubut, Argentina

12

13 \* Corresponding author

14 E-mail: tomasimarina@gmail.com ORCID: 0000-0002-9203-7411

15

16 # These authors contributed equally to this work.

17 ¶ These authors also contributed equally to this work.

## 1 **Abstract**

2 The search for general properties in network structure has been a central issue for food web studies in  
3 recent years. One such property is the small-world topology that combines a high clustering and a small  
4 distance between nodes of the network. This property may increase food web resilience but make them  
5 more sensitive to the extinction of connected species. Food web theory has been developed principally  
6 from freshwater and terrestrial ecosystems, largely omitting marine habitats. If theory needs to be  
7 modified to accommodate observations from marine ecosystems, based on major differences in several  
8 topological characteristics is still on debate. Here we investigated if the small-world topology is a  
9 common structural pattern in marine food webs. We developed a novel, simple and statistically rigorous  
10 method to examine the largest set of complex marine food webs to date. More than half of the analyzed  
11 marine networks exhibited a similar or lower characteristic path length than the random expectation,  
12 whereas 39% of the webs presented a significantly higher clustering than its random counterpart. Our  
13 method proved that 5 out of 28 networks fulfilled both features of the small-world topology: short path  
14 length and high clustering. This work represents the first rigorous analysis of the small-world topology  
15 and its associated features in high-quality marine networks. We conclude that such topology is a  
16 structural pattern that is not maximized in marine food webs; thus it is probably not an effective model  
17 to study robustness, stability and feasibility of marine ecosystems.

## 18 **Introduction**

19 Food webs are complex networks of feeding (trophic) interactions among diverse species in  
20 communities or ecosystems (Dunne 2009). Studies characterizing and modelling food web structure  
21 have suggested the existence of general properties (Link 2002, Williams et al. 2002, Montoya and Solé  
22 2003, Vermaat et al. 2009), as well as simple models that predict the complex structure of these  
23 networks (Cohen et al. 1985, Williams and Martinez 2000, Allesina et al. 2008, Digel et al. 2014,  
24 Johnson et al. 2014).

25 Although some of the earliest food web studies were done considering marine examples  
26 (Petersen 1918, Hardy 1924), food web theory has been developed principally from freshwater and  
27 terrestrial habitats, largely omitting marine ecosystems (Link et al. 2005). Led by Link (2002) and  
28 Dunne et al. (2004), the number of marine food web studies has increased considerably in the last  
29 decade (Bodini et al. 2009, Rezende et al. 2009, Riede et al. 2010, de Santana et al. 2013, Kortsch et al.  
30 2015, Bortanowski et al. 2016, Navia et al. 2016, Marina et al. 2018, among others). Despite the amount

31 of new marine food web data, whether food web theory needs to be modified to accommodate  
32 observations from marine ecosystems, based on major differences in several topological characteristics  
33 (i.e. higher link density, connectance, mean chain length and omnivory), is still on debate (Link 2002). It  
34 has been suggested that more evenly and highly resolved networks are required in order to decide  
35 whether current patterns are artifacts or whether they reflect more significant similarities or differences  
36 between marine and non-marine food webs (Dunne et al. 2004, Vermaat et al. 2009).

37 In this regard, the presence of the small-world (SW) topology (Watts and Strogatz 1998) in  
38 marine food webs is also an open question. This topology, inspired by the “six degrees of separation”  
39 sociology experiment by Milgram (1967), has emerged as a suitable framework to study the global  
40 structure of food webs (Amaral et al. 2000). Two network properties are typically analyzed in order to  
41 gain insight into this pattern: the characteristic path length, a global property of the network that refers to  
42 the average shortest distance between pairs of nodes; and the clustering coefficient, a local property of  
43 the network defined by the average fraction of pairs of nodes connected to the same node that are also  
44 connected to each other (Watts and Strogatz 1998). These features are usually compared to its random  
45 counterpart web (equal size and link density or connectance), with the aim of investigating how much  
46 does the empirical food web deviate from the random one (Watts 1999). A SW network needs to display  
47 a high clustering coefficient and a short characteristic path length, compared to a random graph. The  
48 latter property gives the name “small-world” to these networks, because it is possible to connect any two  
49 vertices in the network through just a few links (Amaral et al. 2000).

50 Furthermore, SW networks may display three of the following scale patterns: scale-free, broad-  
51 scale or single-scale (Amaral et al. 2000). The first one describes a network with very few nodes highly  
52 connected and most nodes poorly connected, following a power-law degree distribution (Barabási et al.  
53 2000, Montoya and Solé 2002). On the other hand, a broad-scale pattern is characterized by a degree  
54 distribution that has a truncated power-law regime or a power-law regime followed by a sharp cutoff  
55 (Montoya et al. 2006). Finally, single-scale networks present a degree distribution with a fast decaying  
56 tail, such as exponential or Gaussian (Amaral et al. 2000). Most studies of empirical food webs show  
57 that degree distributions rarely differ from any of these scale patterns (Camacho et al. 2002, Dunne et al.  
58 2002a, 2002c, Montoya and Solé 2003, Stouffer et al. 2005), meaning that this structural feature (i.e.  
59 degree distribution) would not be essential to determine whether food webs display a SW topology or  
60 not.

61 Disregarding its habitat (e.g. marine, freshwater or terrestrial), several studies have considered  
62 whether empirical food webs display the SW topology similar to many other real-world networks  
63 (Camacho et al. 2002, Dunne et al. 2002c, Montoya and Solé 2002, Bornatowski et al. 2016, Navia et al.  
64 2016). Most of these explored individual marine food webs or considered few networks belonging to  
65 this habitat; while some suggested the presence of the SW topology (Montoya and Solé 2002, Gaichas  
66 and Francis 2008, Navia et al. 2016, Bornatowski et al. 2016), others stated that food webs do not  
67 display such topology (Camacho et al. 2002, Dunne et al. 2002c).

68 Why is it important to explore the SW topology in marine food webs? There is no doubt that  
69 network topology can have important implications for network function (Strogatz 2001). More detailed  
70 knowledge on food web topology in marine ecosystems will help to understand the dynamics of  
71 complex systems, historically subject to intense fisheries pressure and subsequent regime shifts and  
72 collapse (Pauly et al. 1998, Jackson et al. 2001, Rocha et al. 2015, Gårdmark et al. 2015, Gilarranz et al.  
73 2016). In general, consequences of SW topological pattern in food webs are of great importance in  
74 recognizing evolutionary paths and the vulnerability to perturbations (Montoya and Solé 2002). A short  
75 characteristic path length showed by SW food webs imply a rapid spread of an impact (e.g. invasion,  
76 population fluctuation, local extinction) throughout the network (Williams et al. 2002). However, based  
77 on its high clustering coefficient SW networks are associated with rapid responses to disturbances  
78 resulting in a high resilience (Solé and Montoya 2001, Montoya and Solé 2002). Recently, extinction  
79 simulations in three marine food webs displaying this topology presented opposite results regarding  
80 susceptibility to the loss of highly connected species (Gaichas and Francis 2008, Bornatowski et al.  
81 2016, Navia et al. 2016). In this sense, the analysis of large mobile predators might shed light on this  
82 issue, as they are highly connected species, energy-channel couplers and ubiquitously affected by  
83 antropogenic disturbances (Rooney et al. 2008). Therefore, it is not certainly known neither if the SW  
84 topology is a common pattern in marine food webs, nor if the most connected species in such networks  
85 (e.g. species of commercial interest, top predators) should be protected to avoid structural and functional  
86 impacts in ecosystems that cover more than 70% of the planet's surface.

87 As stated above, research on marine food web properties on individual networks is abundant, yet  
88 topological studies analyzing the global structure in large sets of well-resolved marine food webs are  
89 scarce (e.g. Dunne et al. 2004, Riede et al. 2010). The SW topology, a pattern that gives a clear  
90 overview of organization and resistance in trophic networks (Bornatowski et al. 2016), has been difficult

91 to detect in empirical food webs because of incompatibility in used approaches and insufficient  
92 methodological rigour (e.g. Montoya and Solé 2002, Gaichas and Francis 2008, Navia et al. 2016).

93 In this work, our aim was to analyze the SW structural pattern in empirical marine food webs.  
94 For this, we gathered a broad range of high-quality marine food webs, some of which have never been  
95 examined using a topological network approach. We developed and implemented a simple and rigorous  
96 method to determine whether food webs presented the SW topology. This method is rigorous because it  
97 considers the structural properties of interest (i.e. characteristic path length, clustering coefficient and  
98 degree distribution) and statistically tests the probability of presenting such topology, taking into  
99 account the position of the empirical values for the structural properties in the confidence interval (99%)  
100 of the equivalent random networks. Our results were compared with that of Humphries and Gurney  
101 (2008), who proposed a quantitative and continuous small-world-ness metric for complex networks.  
102 Finally, we hypothesized about possible implications of the SW topology for ecosystem functioning in  
103 marine habitats.

## 104 **Methodology**

105 We compiled and selected a large set of well-resolved marine food webs, many of which are  
106 included for the first time in network topology analyses. We limited our inclusion to food webs with a  
107 minimum size (= number of trophic species), following Link et al. (2005) recommendation of  
108 considering only networks with 20-25 nodes at least. The studied food webs represent a wide range of  
109 number of trophic species (27 – 513) and connectance (0.01 – 0.27). The assembled marine food webs  
110 cover from pelagic to coastal habitats, and tropical to polar regions (Table 1). The list is by no means  
111 exhaustive, but the high taxonomic resolution of the webs and the variety of regions that comprises  
112 likely make this list the most representative and comprehensive picture of the topology in real-world  
113 marine food webs.

114 We studied the cumulative degree distribution, or the fraction of trophic species  $P(k)$  that have  $k$   
115 or more trophic links, for each network (Albert and Barabási 2002). The use of cumulative distributions  
116 gives a more accurate picture of the shape of the distribution in small, noisy data sets (Dunne et al.  
117 2002c). Model fit was done using maximum likelihood (McCallum 2008), and model selection was  
118 performed by computing the Akaike Information Criterion corrected for small sample size (AICc)  
119 (Burnham and Anderson 2002).

120 In order to explore the SW phenomenon among these empirical marine food webs, we analyzed

121 the properties of interest: characteristic path length (CPL) and clustering coefficient (CC). The CPL is  
122 defined as the average shortest path length between all pairs of nodes and represents a global property of  
123 the network (Watts and Strogatz 1998). Here, CPL was calculated as the average number of nodes in the  
124 shortest path  $CPL_{Min}(i,j)$  between all pairs of nodes  $V(i,j)$  in a network averaged over  $n(n-1)/2$  nodes  
125 (Montoya and Solé 2002):

$$126$$
$$127 \quad CPL = \frac{2}{n(n-1)} \sum_{i=1}^n \sum_{j=1}^n CPL_{Min}(i,j)$$
$$128$$

129 On the other hand, CC quantifies the local interconnectedness of the network and it is defined as  
130 the fraction of the number of existing links between neighbours of node  $i$  among all possible links  
131 between these neighbours. In this study, the CC of each food web was determined as the average of the  
132 individual clustering coefficients  $CC_i$  of all the nodes in the network. Individual  $CC_i$  were determined as  
133 follows:

$$134$$
$$135 \quad CC_i = \frac{2E_i}{K_i(K_i - 1)}$$
$$136$$

137 where  $E_i$  is the effective number of interactions between  $k_i$  nearest-neighbor nodes of node  $i$  and the  
138 maximal possible number of such interactions (Albert and Barabási 2002, Newman 2003).

139 With the aim of testing whether marine food webs presented the SW topology, we compared the  
140 empirical values of CPL and CC with those resulted from 1000 randomly generated networks with the  
141 same size (S) and number of links (L). Random webs were created using the Erdős-Rényi model, where  
142 links are added to the complete set of nodes (S) and chosen uniformly randomly from the set of all  
143 possible links (Erdős and Rényi 1959). Small-world networks are considered to present similar or lower  
144 CPL values between empirical and random webs ( $CPL_{empirical} \leq CPL_{random}$ ), and a much higher CC  
145 in empirical than in random webs ( $CC_{empirical} \gg CC_{random}$ ) (Watts and Strogatz 1998, Bollobás  
146 2001).

147 The rigourity of our method lies in the use of confidence intervals (CI 99%) for the empirical-  
148 random comparison of the CPL and CC properties. If the empirical value for a particular food web was  
149 positioned within or to the left (=lower than) the CI 99% of the random CPL, and to the right (=higher

150 than) the CI 99% of the CC, then the food web was considered to present the SW topology. We also  
151 calculated the ‘small-world-ness’  $S^{ws}$  metric proposed by Humphries and Gurney (2008) for each studied  
152 food web, and compared these results with our method. If  $S^{ws} > 1$  and  $S^{ws} > S^{ws}$  CI 99% (confidence  
153 interval), then the food web was said to be a SW network.

154 The complete source code for generating the random networks and statistical analyses was done in R (R  
155 Core Team 2017), and is available at GitHub  
156 (<https://github.com/lisaravia/MarineFoodWebsSmallWorld>).

## 157 **Results**

158 The analysis of the topological properties associated with the SW pattern showed that the  
159 characteristic path length (CPL) and the clustering coefficient (CC) among the studied marine food webs  
160 varied from 1.20 to 3.41 and from 0.0026 to 0.66, respectively. Connectance range for these food webs  
161 was 0.01 – 0.27, considering networks comprising from 27 to 513 trophic species (Table 1).

162 The cumulative degree distributions of the marine food webs fitted to a broad variety of models:  
163 exponential, power-law, truncated power-law (power-law regime with a sharp cutoff), lognormal,  
164 uniform. To our surprise some networks displayed a poisson distribution. The majority of the networks  
165 exhibited ‘power-law-like’ (i.e. power-law and truncated power-law = 40%) or uniform (25%)  
166 cumulative degree distributions (Table 1).

167 More than half of the analyzed food webs (19/28) exhibited similar or lower CPL than expected  
168 for random networks. Following the CPL empiric results, minimum and maximum  
169  $CPL_{Empirical}/CPL_{Random}$  ratios were exhibited by those food webs with the lowest and highest empiric  
170 values (i.e. SW Pacific Ocean and Sanak nearshore, respectively). Only 39% of the webs presented  
171 higher CC than its random counterpart. A small number of food webs showed both features: low CPL  
172 and high CC, compared to random networks (Figure 1).

173 The comparison between the small-world-ness metric ( $S^{ws}$ ) defined by Humphries and Gurney  
174 (2008), and our method to determine SW topology in complex networks reflected differences. While the  
175 first one registered that 11 out of 28 webs presented the SW topology, our method proved that only five  
176 food webs exhibited such pattern. These five empiric networks displayed a similar or lower CPL and a  
177 higher CC, compared to the confidence interval 99% of the random networks for each of the topological  
178 properties (Figure 1). Supplementary information S1 presents detailed results on the comparison  
179 between these methods.

180 Following Watts (1999), we positioned each food web in the coordinate system  $x = \text{CPL}$   
 181 empirical/random ratio, and  $y = \text{CC}$  empirical/random ratio (Figure 2). Our method demonstrated that  
 182 the only well-resolved marine food webs that clearly present the SW topology are: Gulf of Lions,  
 183 Florida, Caribbean reef (I), Barents Sea Arctic and Weddell Sea (Figure 2b). Values of CPL and CC  
 184 ratios for the SW marine food webs are: 0.98 and 1.35 (Gulf of Lions), 0.91 and 1.60 (Florida), 0.98 and  
 185 1.49 (Caribbean reef (I)), 0.86 and 2.37 (Barents Sea Arctic), 0.67 and 2.04 (Weddell Sea). It is worth  
 186 noting that network size in these food webs varies from 39 to 442 trophic species; connectance ranges  
 187 from 0.01 to 0.12 (an order of magnitude of difference); and that the degree distribution was: truncated  
 188 power-law, uniform, uniform, exponential and lognormal, respectively (Table 1).

189

190 Table 1. Network properties of high quality marine food webs, ordered by decreasing connectance. S = Size, L = Links, C =  
 191 Connectance ( $L/S^2$ ), CPL = Characteristic Path Length, CC = Clustering Coefficient. DD = fit for cumulative degree  
 192 distribution. \* model fit using maximum likelihood and AICc. References are given for the source of the original network  
 193 data.

| Network                   | Region      | Size | Links | C    | CPL  | CC   | DD                   | Reference                       |
|---------------------------|-------------|------|-------|------|------|------|----------------------|---------------------------------|
| <b>La Guajira</b>         | Tropical    | 27   | 198   | 0.27 | 1.53 | 0.66 | Uniform*             | Criales-Hernández et al. (2006) |
| <b>Benguela</b>           | Temperate   | 29   | 203   | 0.24 | 1.6  | 0.3  | Uniform              | Yodzis (1998)                   |
| <b>NE US Shelf</b>        | Temperate   | 81   | 1482  | 0.23 | 1.6  | 0.31 | Uniform              | Link (2002)                     |
| <b>Gulf of Cadiz</b>      | Temperate   | 42   | 410   | 0.23 | 1.99 | 0.56 | LogNormal*           | Torres et al. (2013)            |
| <b>Baltic Sea</b>         | Temperate   | 33   | 191   | 0.18 | 1.41 | 0.31 | Poisson*             | Yletyinen et al. (2016)         |
| <b>Beagle Channel</b>     | Temperate   | 33   | 183   | 0.17 | 1.46 | 0.32 | Uniform*             | Riccialdelli et al. (2017)      |
| <b>Angola</b>             | Subtropical | 28   | 127   | 0.16 | 1.61 | 0.36 | Uniform*             | Angelini & Vaz-Velho (2011)     |
| <b>Chilean rocky</b>      | Temperate   | 106  | 1362  | 0.12 | 1.34 | 0.11 | Truncated power-law* | Kéfi et al. (2015)              |
| <b>Gulf of Lions</b>      | Temperate   | 39   | 189   | 0.12 | 1.77 | 0.34 | Truncated power-law* | Banaru et al. (2013)            |
| <b>Florida</b>            | Tropical    | 48   | 221   | 0.1  | 1.76 | 0.31 | Uniform*             | Christian & Luczcovich (1999)   |
| <b>Simon Bay</b>          | Temperate   | 30   | 70    | 0.08 | 1.7  | 0.12 | Poisson*             | Filgueira & Castro (2011)       |
| <b>Celtic Sea</b>         | Temperate   | 48   | 169   | 0.07 | 2.3  | 0.3  | Exponential*         | Woodward et al. (2010)          |
| <b>Cuba</b>               | Tropical    | 240  | 3874  | 0.07 | 1.86 | 0.11 | Truncated power-law* | Roopnarine & Hertog (2012)      |
| <b>Jamaica</b>            | Tropical    | 249  | 4105  | 0.07 | 1.84 | 0.12 | Truncated power-law* | Roopnarine & Hertog (2012)      |
| <b>Cayman Is.</b>         | Tropical    | 242  | 3766  | 0.06 | 1.85 | 0.11 | Truncated power-law* | Roopnarine & Hertog (2012)      |
| <b>Monterey Bay</b>       | Temperate   | 37   | 79    | 0.06 | 1.4  | 0.09 | Truncated power-law* | Glynn (1965)                    |
| <b>Barents Sea Boreal</b> | Tropical    | 180  | 1546  | 0.05 | 2.28 | 0.25 | Exponential          | Kortsch et al. (2015)           |
| <b>Caribbean reef (I)</b> | Temperate   | 249  | 3312  | 0.05 | 1.9  | 0.16 | Uniform              | Opitz (1996)                    |



|                           |             |     |      |      |      |                   |                      |                           |
|---------------------------|-------------|-----|------|------|------|-------------------|----------------------|---------------------------|
| <b>Potter Cove</b>        | Subtropical | 91  | 307  | 0.04 | 1.82 | 0.09              | Exponential*         | Marina et al. (2018)      |
| <b>Southern Brazil</b>    | Polar       | 139 | 837  | 0.04 | 3.25 | 0.07              | Truncated power-law  | Bornatowski et al. (2016) |
| <b>Barents Sea Arctic</b> | Subtropical | 159 | 848  | 0.03 | 2.06 | 0.16              | Exponential          | Kortsch et al. (2015)     |
| <b>Beach Peru</b>         | Polar       | 46  | 74   | 0.03 | 1.71 | 0.09              | Exponential*         | Koepcke & Koepcke (1952)  |
| <b>Sanak intertidal</b>   | Polar       | 235 | 1804 | 0.03 | 3.06 | 0.15              | Truncated power-law* | Dunne et al. (2016)       |
| <b>Sanak nearshore</b>    | Polar       | 513 | 6774 | 0.03 | 3.41 | 0.18              | LogNormal*           | Dunne et al. (2016)       |
| <b>SW Pacific Ocean</b>   | Temperate   | 109 | 202  | 0.02 | 1.2  | 0.02              | Truncated power-law* | Dambacher et al. (2010)   |
| <b>Gulf of Alaska</b>     | Tropical    | 406 | 1057 | 0.01 | 2.59 | 0.00 <sup>1</sup> | Power-law            | Gaichas & Francis (2008)  |
| <b>Gulf of Tortugas</b>   | Polar       | 256 | 647  | 0.01 | 1.65 | 0.02              | LogNormal            | Navia et al. (2016)       |
| <b>Weddell Sea</b>        | Polar       | 442 | 1915 | 0.01 | 2.05 | 0.04              | LogNormal*           | Jacob (2005)              |

194

Note: <sup>1</sup> clustering coefficient for Gulf of Alaska food web is 0.0026.

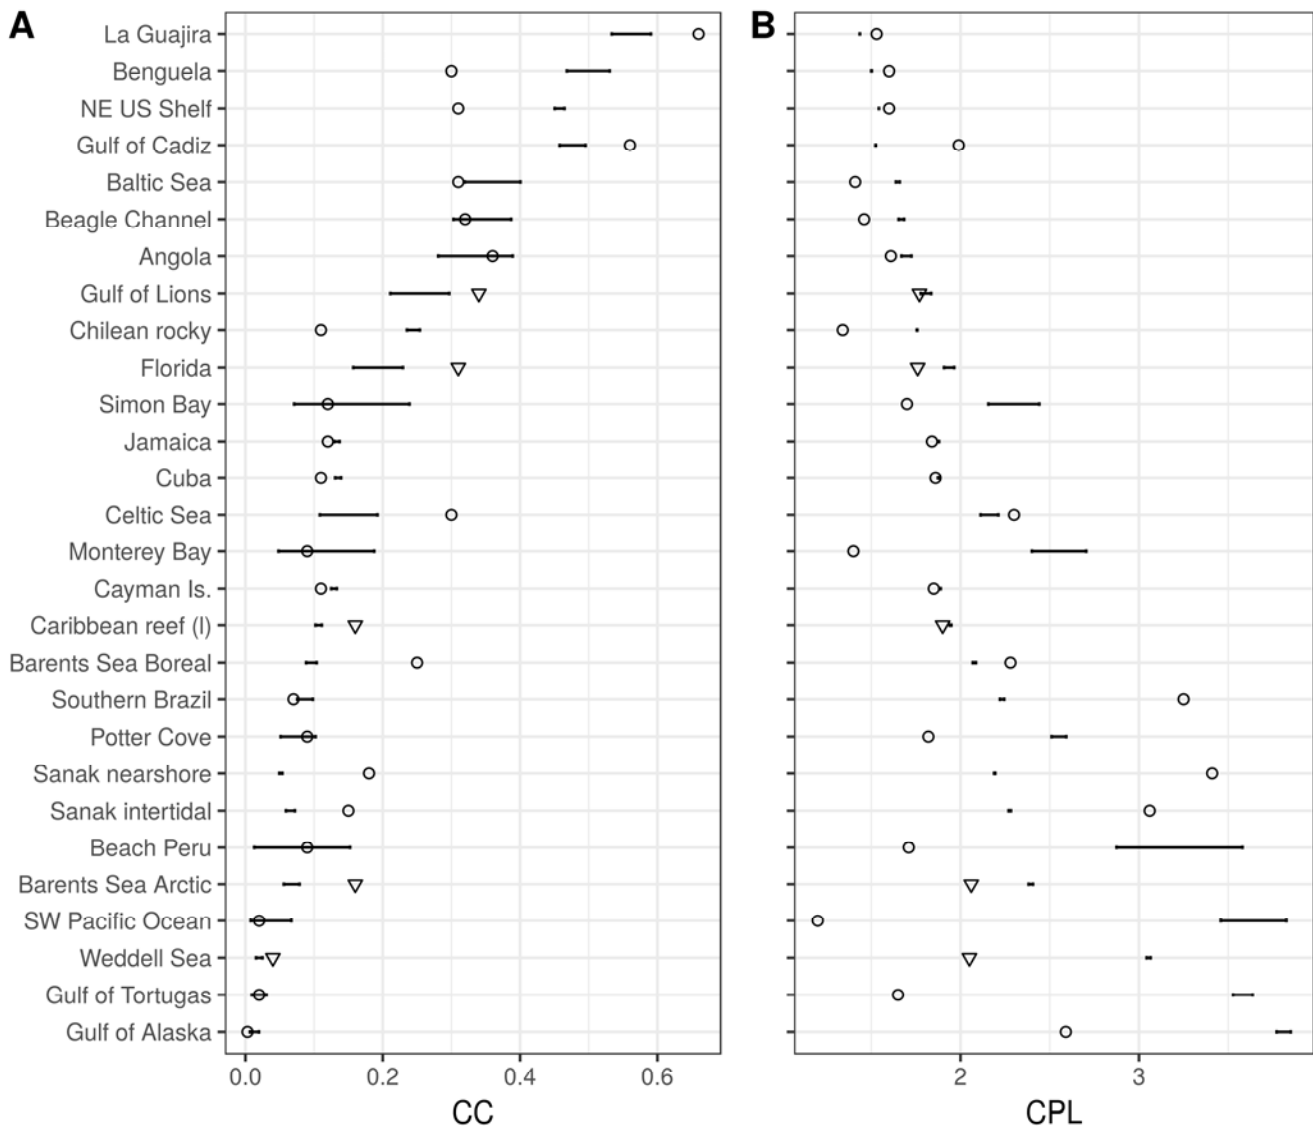

195

196 Figure 1. A) Clustering Coefficient (CC) and B) Characteristic Path Length (CPL) for empirical and random networks  
 197 (ordered by decreasing connectance), generated with the same size (S) and number of links (L). Horizontal line for each food  
 198 web corresponds to the confidence interval (99%) of the 1000 random networks. The inverted triangle symbol indicates food  
 199 webs that follow the SW topology according to our method.

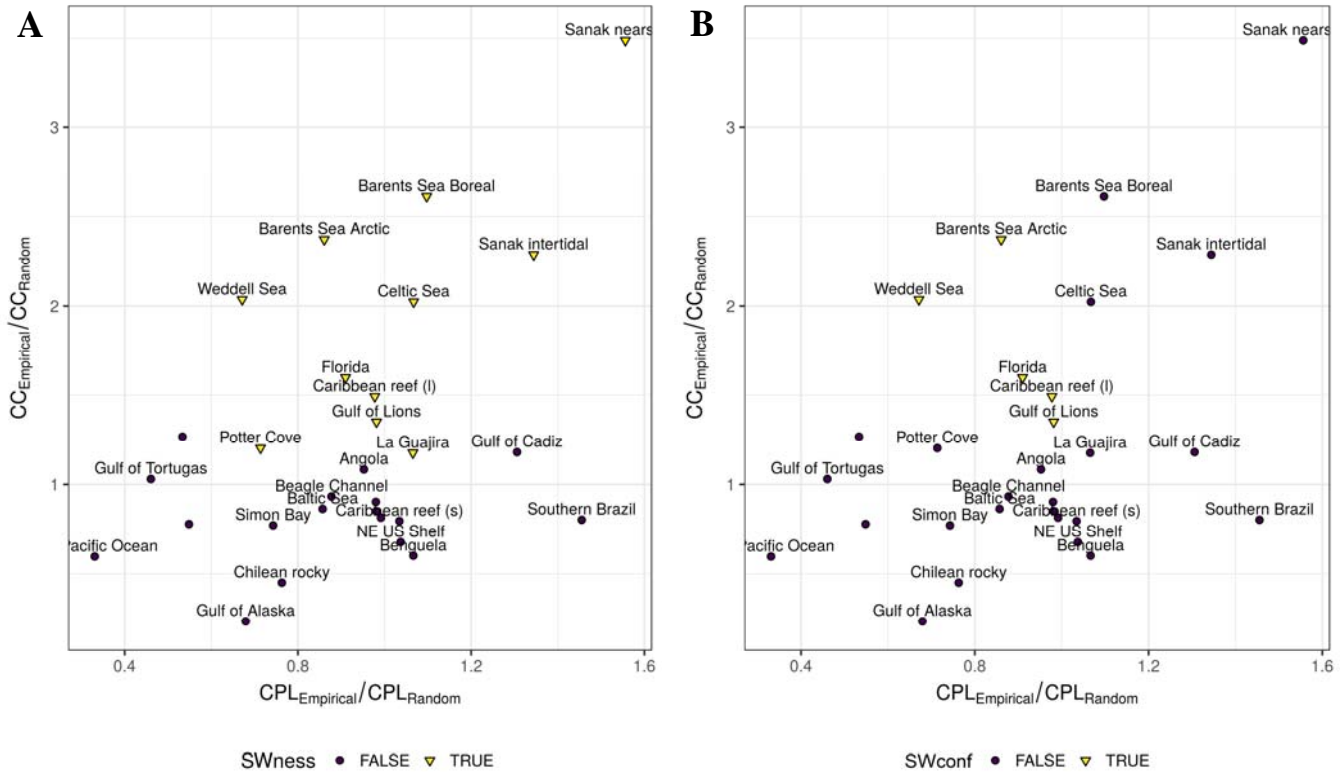

200  
 201 Figure 2. Characteristic Path Length (CPL) and Clustering Coefficient (CC) empirical/random ratios. Marine food webs that  
 202 follow a SW topology according to A) small-world-ness metric (SWness), and B) our method (SWconf). SW networks are  
 203 indicated with an inverted yellow triangle.

## 204 Discussion

205 The method developed and applied in this study to determine whether high quality food webs  
 206 present the SW topology showed that most of the marine networks analyzed do not display such  
 207 topology. Likewise, Dunne et al. (2002c) argued that food webs are not SW networks, though other  
 208 studies identify several individual or small sets of food webs as having the SW topology (Solé and  
 209 Montoya 2001, Camacho et al. 2002, Montoya and Solé 2002, Gaichas and Francis 2008, Navia et al.  
 210 2016, Bornatowski et al. 2016).

211 The first condition for a network to exhibit a SW topology is a short distance between all nodes  
 212 of the web. All studies looking at this topology in food webs have reported short path lengths similar to  
 213 random expectations, coincident with one aspect of such structural pattern (Dunne 2006). Consistently,

214 the majority of the CPL empiric values for the analyzed marine food webs in the present study were  
215 similar or lower than the random webs.

216 Previously suggested dependence of CPL on connectance (i.e. path length decreases with increasing  
217 connectance) (Williams et al. 2002, Vermaat et al. 2009, Riede et al. 2010) was not found among the  
218 largest and most complex marine food webs available to date. In this regard, the lowest and highest  
219 values for CPL in the analyzed networks were displayed by marine food webs with relatively very low  
220 connectance ( $C = 0.02$  and  $0.03$ , respectively). On the other hand, CPL might be sensitive to network  
221 size in marine food webs, but with an opposite scaling relationship as described by Riede et al. (2010),  
222 since the shortest CPL occurred in SW Pacific Ocean food web,  $S = 109$ , and the longest CPL was found  
223 in Sanak nearshore web ( $S = 513$ ), a food web five times larger than the first one. There is no doubt that  
224 the mechanisms responsible for short path lengths and potentially scaling correlations with other  
225 structural properties in marine food webs deserve further investigation.

226 In spite of short path lengths, similar to random expectations, currently available food web data  
227 clearly deviate from the SW topology due to a low clustering coefficient compared to random networks  
228 (Dunne et al. 2002c). Although analyses of compartmentalization in aquatic and terrestrial ecosystems  
229 and food web models are profused (May 1972, Krause et al. 2003, Allesina and Pascual 2009, Stouffer  
230 and Bascompte 2011), few studies have evaluated the presence of clusters (i.e. subsets of species that  
231 interact more frequently among themselves than with other species in the community, compared to  
232 random networks) in well-resolved marine food webs. In this sense, Pérez-Matus et al. (2017) reported 5  
233 compartments for the Chilean subtidal food web (not included here due to lack of information), and  
234 Rezende et al. (2009) found for the Caribbean reef food web (included here) a significant  
235 compartmentalized structure, higher than that expected for its random counterpart. However, the present  
236 study demonstrates that in general marine food webs tend to have low clustering coefficients ( $\ll 1$ ); less  
237 than half of the networks (11 out of 28) showed a significantly higher empiric clustering coefficient  
238 compared to the random expectation (i.e.  $CC_{\text{Empiric}} > CC_{\text{Random}}$  CI 99%). As a result,  
239 compartmentalization in marine ecosystems is very small, meaning that food webs are characterized by  
240 trophic species highly interconnected between each other. It has been suggested that being  
241 compartmentalized is advantageous to a community because compartments buffer the propagation of  
242 extinctions, and that the observed architecture of empirical food webs (e.g. SW topology) increases both  
243 the persistence and resilience against perturbation (Stouffer and Bascompte 2011, Gilarranz et al. 2017).  
244 Therefore, the fact that the analysis of the largest set of complex marine food webs statistically showed

245 that the minority of the networks displays high clustering coefficients brings to light that: 1) current  
246 marine food webs are predicted to be fragile and susceptible to structural changes with consequent  
247 alterations in the functioning of the ecosystem, or 2) the influence of the clustering coefficient in the  
248 stability and feasibility of large marine communities is not as significant as it is thought.

249 The drivers of a lower empiric clustering coefficient than its random counterpart in food webs are  
250 suggested to be small network size (i.e. low diversity) and high connectance, features displayed in  
251 ecological networks compared to other network types (e.g. neuronal, social and technological) (Dunne  
252 2006). On the contrary, we have showed that large food webs (> 100 trophic species) can also present  
253 notably low clustering coefficient ratios (e.g. Chilean rocky, SW Pacific Ocean, Gulf of Alaska), similar  
254 to what Camacho et al. (2002) have suggested. Regarding connectance, SW marine networks exhibited  
255 one order of magnitude of difference (0.12 – 0.01). Neither network size nor complexity (= connectance)  
256 seem to be playing an important role in explaining the lack of compartmentalized structures in marine  
257 food webs; highly interconnected nodes might be the case for these networks. These findings imply that  
258 species-rich food webs (i.e. high diversity) in the marine ecosystem might not be organized by  
259 combining sub-web compartments, as previously suggested for food webs in general (Riede et al. 2010).

260 Small-world networks seem to exhibit a variety of degree distributions (Amaral et al. 2000). To  
261 date, it has been reported and identified in SW food webs the presence of scale-free or ‘power-law like’  
262 structures (Montoya and Solé 2002, Gaichas and Francis 2008, Bornatowski et al. 2016, Navia et al.  
263 2016) and exponential distributions (Camacho et al. 2002). Here, the majority of the marine food webs  
264 identified as having the SW structural pattern showed neither ‘power-law like’ nor exponential degree  
265 distributions; instead they fit to uniform and lognormal models. This is the first study that, using a robust  
266 statistical methodology (i.e. maximum likelihood and Akaike Criterion), presents evidence for the  
267 occurrence of uniform degree distribution in SW food webs. Added to the three classes of small-world  
268 networks proposed by Amaral et al. (2000), we suggest a new class: uniform-scale networks,  
269 characterized by a connectivity distribution with an approximately constant node degree. It has been  
270 hypothesized that the presence of uniform degree distributions in food webs may occur in relatively  
271 small (= few nodes) and high-connected networks (Dunne et al. 2002b). Food webs with this type of  
272 distribution are expected to be more robust against intentional removal of the most connected nodes than  
273 networks with more skewed distributions (Albert et al. 2000, Estrada 2007). Nearly all of the marine  
274 food webs assessed in the current study follow the pattern suggested by Dunne et al. (2002b), with the  
275 exception of the Caribben reef food web that is comparatively large (S=249) and low connected

276 (C=0.05). As it seems to occur in general with food web degree distributions (Dunne et al. 2002b), SW  
277 networks in the marine ecosystem may display a broad variety of distribution models which proves the  
278 minor influence of such property in the structural pattern of marine food webs. Furthermore, in contrast  
279 with what is expected in real-world networks (Dunne et al. 2002b, Montoya and Solé 2002, Newman  
280 2003), we have demonstrated that empiric marine food webs display poisson degree distributions (e.g.  
281 Baltic Sea and Simon Bay).

282 It has been suggested that network size, connectance and the degree distribution pattern are  
283 drivers of the SW topology in complex networks in general (Humphries and Gurney 2008) and in food  
284 webs in particular (Thompson and Townsend 2000, Dunne et al. 2002c). After applying a novel small-  
285 world-ness metric to examine several classes of real-world networks (e.g. social, information,  
286 technological and biological), Humphries and Gurney (2008) concluded that high connectance results in  
287 low SW-ness, confirming what was stated for food webs (Dunne 2006). Although we have not  
288 performed correlation analyses, neither of the suggested drivers seems to be playing an important role in  
289 the presence of the SW structural pattern in marine food webs: SW food web network size and  
290 connectance ranged from 39 to 442 and from 0.12 to 0.01 (one order of magnitude of difference),  
291 respectively. In addition, three different models fit their degree distributions: ‘power-law like’ (power-  
292 law and truncated power-law), lognormal and uniform.

293 After examining the features of the SW topology (i.e. path length, clustering coefficient and  
294 degree distribution) and exposing the discrepancies among studies, it seems more than appropriate the  
295 application of a rigorous method like the one proposed here if the aim is to search for a universal,  
296 generalized model explaining the structural pattern in food webs. Early suggested correlations between  
297 path length, clustering coefficient and degree distribution with network size and connectance in food  
298 webs (e.g. Dunne et al. 2002b, Williams et al. 2002, Vermaat et al. 2009, Riede et al. 2010) might not be  
299 followed in the structure of marine networks. It is crucial to better understand the topology and possible  
300 scaling relationships among food web properties in marine ecosystems, since network structure has deep  
301 consequences in the functioning of exploited systems (Gaichas and Francis 2008, Bornatowski et al.  
302 2014, Navia et al. 2016, Pérez-Matus et al. 2017).

303 In conclusion, this study represents the first rigorous analysis of the SW topology and its  
304 associated features in the largest set of complex marine food webs examined to date. It attempts to  
305 resolve the ‘small-world controversy’ in food webs. The SW topology is a structural pattern that is not

306 maximized in marine food webs; thus it is probably not an effective model to study the robustness,  
307 stability and feasibility of marine ecosystems.

## 308 **Acknowledgments**

309 This research was supported by Consejo Nacional de Investigaciones Científicas y Técnicas  
310 (CONICET, Argentina), Universidad Nacional de General Sarmiento and Universidad Nacional de  
311 Luján. The work was partially funded by PIO 14420140100035CO CONICET Argentina and conducted  
312 in the frame of TIM PhD studies. The work was conducted in the frames of the EU research network  
313 IMCONet funded by the Marie Curie Action IRSES (FP7 IRSES, Action No. 319718).

## 314 **References**

- 315 1. Amaral LA, Scala A, Barthelemy M, Stanley HE. Classes of small-world networks. Proceedings  
316 of the national academy of sciences. 2000;97: 11149-52.  
317
- 318 2. Angelini R, Vaz-Velho F. Ecosystem structure and trophic analysis of Angolan fishery landings.  
319 *Scientia Marina*. 2011;75: 309-19.  
320
- 321 3. Albert R, Barabási AL. Statistical mechanics of complex networks. *Reviews of modern physics*.  
322 2002; 74:47.  
323
- 324 4. Albert R, Jeong H, Barabási AL. Error and attack tolerance of complex networks. *Nature*.  
325 2000;406: 378.  
326
- 327 5. Allesina S, Pascual M. Food web models: a plea for groups. *Ecology letters*. 2009;12: 652-62.  
328
- 329 6. Allesina S, Alonso D, Pascual M. A general model for food web structure. *science*. 2008;320:  
330 658-61.  
331
- 332 7. Bănaru D, Mellon-Duval C, Roos D, Bigot JL, Souplet A, Jadaud A, Beaubrun P, Fromentin JM.  
333 Trophic structure in the Gulf of Lions marine ecosystem (north-western Mediterranean Sea) and  
334 fishing impacts. *Journal of Marine Systems*. 2013;111: 45-68.  
335
- 336 8. Barabási AL. *Linked: The new science of networks*. Vol 1. Cambridge: Perseus; 2002.  
337
- 338 9. Barabási AL, Albert R, Jeong H. Scale-free characteristics of random networks: the topology of  
339 the world-wide web. *Physica A: statistical mechanics and its applications*. 2000;281: 69-77.  
340
- 341 10. Bodini A, Bellingeri M, Allesina S, Bondavalli C. Using food web dominator trees to catch  
342 secondary extinctions in action. *Philosophical Transactions of the Royal Society B: Biological  
343 Sciences*. 2009;364: 1725-31.  
344
- 345 11. Bollobás B. *Random Graphs*. Cambridge: Cambridge University Press; 2001.

- 346 12. Bornatowski H, Barreto R, Navia AF, Amorim AF. Topological redundancy and  
347 'small-world' patterns in a food web in a subtropical ecosystem of Brazil. *Marine Ecology*.  
348 2016;38.  
349
- 350 13. Burnham KP, Anderson DR. Model selection and multimodel inference: a practical information-  
351 theoretic approach. Springer Science & Business Media; 2002.  
352
- 353 14. Camacho J, Guimerà R, Amaral LA. Robust patterns in food web structure. *Physical Review*  
354 *Letters*. 2002;88: 228102.  
355
- 356 15. Cohen JE, Newman CM, Briand F. A stochastic theory of community food webs II. Individual  
357 webs. *Proc. R. Soc. Lond. B*. 1985;224: 449-461.  
358
- 359 16. Criales-Hernández MI, B García C, Wolff M. Flujos de biomasa y estructura de un ecosistema de  
360 surgencia tropical en La Guajira, Caribe colombiano. *Revista de biología tropical*. 2006;54:  
361 1257-82.  
362
- 363 17. Christian RR, Luczkovich JJ. Organizing and understanding a winter's seagrass foodweb  
364 network through effective trophic levels. *Ecological modelling*. 1999;117: 99-124.  
365
- 366 18. Dambacher JM, Young JW, Olson RJ, Allain V, Galván-Magaña F, Lansdell MJ, Bocanegra-  
367 Castillo N, Alatorre-Ramírez V, Cooper SP, Duffy LM. Analyzing pelagic food webs leading to  
368 top predators in the Pacific Ocean: a graph-theoretic approach. *Progress in Oceanography*.  
369 2010;86: 152-65.  
370
- 371 19. de Santana CN, Rozenfeld AF, Marquet PA, Duarte CM. Topological properties of polar food  
372 webs. *Marine ecology progress series*. 2013;474: 15-26.  
373
- 374 20. Digel C, Curtsdotter A, Riede J, Klarner B, Brose U. Unravelling the complex structure of forest  
375 soil food webs: higher omnivory and more trophic levels. *Oikos*. 2014;123: 1157-72.  
376
- 377 21. Dunne JA. The network structure of food webs. In: Pascual M, Dunne JA, editors. *Ecological*  
378 *networks: linking structure to dynamics in food webs*. Oxford University Press; 2006. pp. 27-86.  
379
- 380 22. Dunne JA. Food webs. In: Meyers RA, editor. *Encyclopedia of complexity and systems science*;  
381 2009. pp. 3661-3682.  
382
- 383 23. Dunne JA, Williams RJ, Martinez ND. Network structure and biodiversity loss in food webs:  
384 robustness increases with connectance. *Ecology letters*. 2002a;5: 558-67.  
385
- 386 24. Dunne JA, Williams RJ, Martinez ND. Food-web structure and network theory: the role of  
387 connectance and size. *Proceedings of the National Academy of Sciences*. 2002b;99: 12917-22.  
388
- 389 25. Dunne JA, Williams RJ, Martinez ND. Small networks but not small worlds: unique aspects of  
390 food web structure. SFI Working Paper; 2002c.

- 391 26. Dunne JA, Williams RJ, Martinez ND. Network structure and robustness of marine food webs.  
392 Marine Ecology Progress Series. 2004;273: 291-302.  
393
- 394 27. Dunne JA, Maschner H, Betts MW, Huntly N, Russell R, Williams RJ, Wood SA. The roles and  
395 impacts of human hunter-gatherers in North Pacific marine food webs. Scientific reports. 2016;6:  
396 21179.  
397
- 398 28. Erdős P, Rényi A. On random graphs, I. Publicationes Mathematicae (Debrecen). 1959;6: 290-7.  
399
- 400 29. Estrada E. Food webs robustness to biodiversity loss: the roles of connectance, expansibility and  
401 degree distribution. Journal of theoretical biology. 2007;244: 296-307.  
402
- 403 30. Filgueira R, Castro BG. Study of the trophic web of San Simón Bay (Ría de Vigo) by using  
404 stable isotopes. Continental Shelf Research. 2011;3: 476-87.  
405
- 406 31. Gaichas SK, Francis RC. Network models for ecosystem-based fishery analysis: a review of  
407 concepts and application to the Gulf of Alaska marine food web. Canadian Journal of Fisheries  
408 and Aquatic Sciences. 2008;65: 1965-82.  
409
- 410 32. Gårdmark A, Casini M, Huss M, van Leeuwen A, Hjelm J, Persson L, de Roos AM. Regime  
411 shifts in exploited marine food webs: detecting mechanisms underlying alternative stable states  
412 using size-structured community dynamics theory. Phil. Trans. R. Soc. B. 2015;370: 20130262.  
413
- 414 33. Gilarranz LJ, Mora C, Bascompte J. Anthropogenic effects are associated with a lower  
415 persistence of marine food webs. Nature communications. 2016;7: 10737.  
416
- 417 34. Gilarranz LJ, Rayfield B, Liñán-Cembrano G, Bascompte J, Gonzalez A. Effects of network  
418 modularity on the spread of perturbation impact in experimental metapopulations. Science.  
419 2017;357: 199-201.  
420
- 421 35. Glynn PW. Community composition, structure, and interrelationships in the marine intertidal  
422 *Endocladia muricata*–*Balanus glandula* association in Monterey Bay, California. *Beaufortia*.  
423 1965;12: 1-98.  
424
- 425 36. Hardy AC. The herring in relation to its animate environment I. The food and feeding habits of  
426 the herring with special reference to the east coast of England. *Fish. Invest., Lond.*. 1924;2: 53.  
427
- 428 37. Humphries MD, Gurney K. Network ‘small-world-ness’: a quantitative method for determining  
429 canonical network equivalence. *PloS one*. 2008;3: e0002051.  
430
- 431 38. Jackson JB, Kirby MX, Berger WH, Bjorndal KA, Botsford LW, Bourque BJ, Bradbury RH,  
432 Cooke R, Erlandson J, Estes JA, Hughes TP. Historical overfishing and the recent collapse of  
433 coastal ecosystems. *Science*. 2001;293: 629-37.  
434
- 435 39. Jacob U. Trophic Dynamics of Antarctic Shelf Ecosystems, Food Webs and Energy Flow  
436 Budgets. Ph.D. Thesis, University of Bremen. 2005.



- 437 40. Johnson S, Domínguez-García V, Donetti L, Muñoz MA. Trophic coherence determines food-  
438 web stability. *Proceedings of the National Academy of Sciences*. 2014;111: 17923-8.  
439
- 440 41. Kéfi S, Berlow EL, Wieters EA, Joppa LN, Wood SA, Brose U, Navarrete SA. Network  
441 structure beyond food webs: mapping non-trophic and trophic interactions on Chilean rocky  
442 shores. *Ecology*. 2015;96: 291-303.  
443
- 444 42. Koepcke HW, Koepcke M. Sobre el proceso de transformación de la materia orgánica en las  
445 playas arenosas marinas del Perú. *Mus Hist Nat Javier Prado*. 1952;8: 1-25.  
446
- 447 43. Kortsch S, Primicerio R, Fossheim M, Dolgov AV, Aschan M. Climate change alters the  
448 structure of arctic marine food webs due to poleward shifts of boreal generalists. *Proc. R. Soc. B*.  
449 2015;282: 20151546.  
450
- 451 44. Krause AE, Frank KA, Mason DM, Ulanowicz RE, Taylor WW. Compartments revealed in  
452 food-web structure. *Nature*. 2003;426: 282.  
453
- 454 45. Link J. Does food web theory work for marine ecosystems?. *Marine ecology progress series*.  
455 2002;230: 1-9.  
456
- 457 46. Link JS, Stockhausen WT, Methratta ET. Food-web theory in marine ecosystems. In: Belgrano A  
458 et al, editors. *Aquatic food webs: an ecosystem approach*. Oxford University Press; 2005. pp. 98-  
459 114.  
460
- 461 47. Marina TI, Salinas V, Cordone G, Campana G, Moreira E, Deregibus D, et al. The food web of  
462 Potter Cove (Antarctica): complexity, structure and function. *Estuarine, Coastal and Shelf  
463 Science*. 2018;200: 141-51.  
464
- 465 48. May RM. Will a large complex system be stable? *Nature*. 1972;238: 413.  
466
- 467 49. McCallum H. *Population parameters: estimation for ecological models*. John Wiley & Sons;  
468 2008.  
469
- 470 50. Milgram S. The small world problem. *Psychology Today*. 1967;1: 61-7.  
471
- 472 51. Montoya JM, Solé RV. Small world patterns in food webs. *Journal of theoretical biology*.  
473 2002;214: 405-12.  
474
- 475 52. Montoya JM, Solé RV. Topological properties of food webs: from real data to community  
476 assembly models. *Oikos*. 2003;102: 614-22.  
477
- 478 53. Montoya JM, Pimm SL, Solé RV. Ecological networks and their fragility. *Nature*. 2006;442:  
479 259.  
480
- 481 54. Navia AF, Cruz-Escalona VH, Giraldo A, Barausse A. The structure of a marine tropical food  
482 web, and its implications for ecosystem-based fisheries management. *Ecological modelling*.  
2016;328: 23-33.

- 483 55. Newman ME. The structure and function of complex networks. SIAM review. 2003;45: 167-256.  
484
- 485 56. Opitz S. Trophic interactions in Caribbean coral reefs. International Center for Aquatic  
486 Resources; 1996.  
487
- 488 57. Pauly D, Christensen V, Dalsgaard J, Froese R, Torres F. Fishing down marine food webs.  
489 Science. 1998;279: 860-3.  
490
- 491 58. Perez-Matus A, Ospina-Alvarez A, Camus PA, Carrasco SA, Fernandez M, Gelcich S, Godoy N,  
492 Ojeda FP, Pardo LM, Rozbaczylo N, Subida MD. Temperate rocky subtidal reef community  
493 reveals human impacts across the entire food web. Marine Ecology Progress Series. 2017;567: 1-  
494 6.  
495
- 496 59. Petersen CGJ. The Sea Bottom and Its Production of Fish-food. Report of the Danish Biological  
497 Station. 1918;21: 1-44.  
498
- 499 60. Rezende EL, Albert EM, Fortuna MA, Bascompte J. Compartments in a marine food web  
500 associated with phylogeny, body mass, and habitat structure. Ecology Letters. 2009;12: 779-88.  
501
- 502 61. Riccialdelli L, Newsome SD, Fogel ML, Fernández DA. Trophic interactions and food web  
503 structure of a subantarctic marine food web in the Beagle Channel: Bahía Lapataia, Argentina.  
504 Polar Biology. 2017;40: 807-21.  
505
- 506 62. Riede JO, Rall BC, Banasek-Richter C, Navarrete SA, Wieters EA, Emmerson MC, Jacob U,  
507 Brose U. Scaling of food-web properties with diversity and complexity across ecosystems.  
508 Advances in Ecological Research. 2010;42: 139-170.  
509
- 510 63. Rocha J, Yletyinen J, Biggs R, Blenckner T, Peterson G. Marine regime shifts: drivers and  
511 impacts on ecosystems services. Phil. Trans. R. Soc. B. 2015;370: 20130273.  
512
- 513 64. Rooney N, McCann KS, Moore JC. A landscape theory for food web architecture. Ecology  
514 Letters. 2008;11: 867-81.  
515
- 516 65. Roopnarine PD, Hertog R. Detailed food web networks of three Greater Antillean coral reef  
517 systems: the Cayman Islands, Cuba, and Jamaica. Dataset Papers in Science. 2013.  
518
- 519 66. Solé RV, Montoya M. Complexity and fragility in ecological networks. Proceedings of the Royal  
520 Society of London B: Biological Sciences. 2001;268: 2039-45.  
521
- 522 67. Stouffer DB, Bascompte J. Compartmentalization increases food-web persistence. Proceedings  
523 of the National Academy of Sciences. 2011;108: 3648-52.  
524
- 525 68. Stouffer DB, Camacho J, Guimera R, Ng CA, Nunes Amaral LA. Quantitative patterns in the  
526 structure of model and empirical food webs. Ecology. 2005;86: 1301-11.  
527
- 528 69. Strogatz SH. Exploring complex networks. nature. 2001;410: 268.

529

- 530 70. Team RC. R: A language and environment for statistical computing. R Foundation for Statistical  
531 Computing, Vienna, Austria; 2016.
- 532
- 533 71. Thompson RM, Townsend CR. Is resolution the solution?: the effect of taxonomic resolution on  
534 the calculated properties of three stream food webs. *Freshwater Biology*. 2000;44: 413-22.
- 535
- 536 72. Torres MÁ, Coll M, Heymans JJ, Christensen V, Sobrino I. Food-web structure of and fishing  
537 impacts on the Gulf of Cadiz ecosystem (South-western Spain). *Ecological modelling*. 2013;265:  
538 26-44.
- 539
- 540 73. Vermaat JE, Dunne JA, Gilbert AJ. Major dimensions in food web structure properties.  
541 *Ecology*. 2009;90: 278-82.
- 542
- 543 74. Watts DJ. Networks, dynamics, and the small-world phenomenon. *American Journal of*  
544 *Sociology*. 1999;105: 493-527.
- 545
- 546 75. Watts DJ, Strogatz SH. Collective dynamics of ‘small-world’ networks. *nature*. 1998;393: 440.
- 547
- 548 76. Williams RJ, Martinez ND. Simple rules yield complex food webs. *Nature*. 2000;404: 180.
- 549
- 550 77. Williams RJ, Berlow EL, Dunne JA, Barabási AL, Martinez ND. Two degrees of separation in  
551 complex food webs. *Proceedings of the National Academy of Sciences*. 2002;99: 12913-6.
- 552
- 553 78. Woodward G, Blanchard J, Lauridsen RB, Edwards FK, Jones JI, Figueroa D, Warren PH,  
554 Petchey OL. Individual-based food webs: species identity, body size and sampling effects.  
555 *Advances in ecological research*. 2010;43: 211-266.
- 556
- 557 79. Yletyinen J, Bodin Ö, Weigel B, Nordström MC, Bonsdorff E, Blenckner T. Regime shifts in  
558 marine communities: a complex systems perspective on food web dynamics. *InProc. R. Soc. B*.  
559 2016;283: 20152569.
- 560
- 561 80. Yodzis P. Local trophodynamics and the interaction of marine mammals and fisheries in the  
562 Benguela ecosystem. *Journal of Animal Ecology*. 1998;67: 635-58.
